# Supplementary material for: Effects of Temsavir, Active Moiety of Antiretroviral Agent Fostemsavir, on QT Interval: Results From a Phase I Study and an Exposure–Response Analysis
Source: PubMed Central journal article supplement — Clin Transl Sci. 2020 Mar 19;13(4):769–76. doi: 10.1111/cts.12763 (PMC7359933; doi:10.1111/cts.12763), 2020-03-19
Supplement: CTS-13-769-s001.pdf [file CTS-13-769-s001.pdf]

**Figure S1. Concentration–time plots and exposure parameters for fostemsavir (FTR) 1200 mg once daily (QD) and 2400 mg twice daily (BID) in study Part B.**

*Inset shows the concentration–time plot on a semi-logarithmic scale*

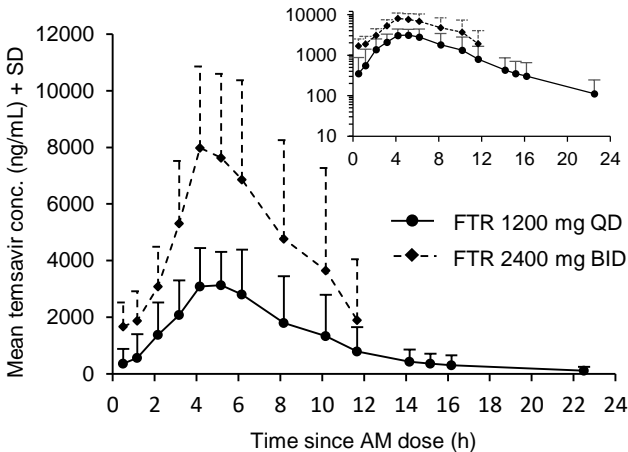

|                       | 1200 mg FTR QD<br>(N=57) | 2400 mg FTR BID<br>(N=53) |
|-----------------------|--------------------------|---------------------------|
| $C_{max}$ , ng/mL     | 3584 (41.3)              | 8900 (32.8)               |
| $AUC_{tau}$ , ng·h/mL | 21735 (50.1)             | 50127 (42.3)              |
| $T_{max}$ , h*        | 5.20 (2.18–10.2)         | 4.20 (3.2–10.2)           |

*Parameters are geometric mean (%CV) or \*median (range).*

*Profiles are shown for the dosing interval after the first or AM dose.*
