# Supplementary material for: Effects of Temsavir, Active Moiety of Antiretroviral Agent Fostemsavir, on QT Interval: Results From a Phase I Study and an Exposure–Response Analysis
Source: PubMed Central journal article supplement — Clin Transl Sci. 2020 Mar 19;13(4):769–76. doi: 10.1111/cts.12763 (PMC7359933; doi:10.1111/cts.12763), 2020-03-19

**Figure S2. Time-from-dose plots of mean temsavir concentration (left axis) and ddQTcF (right axis) for (A) fostemsavir 1200 mg once daily, (B) fostemsavir 2400 mg twice daily**

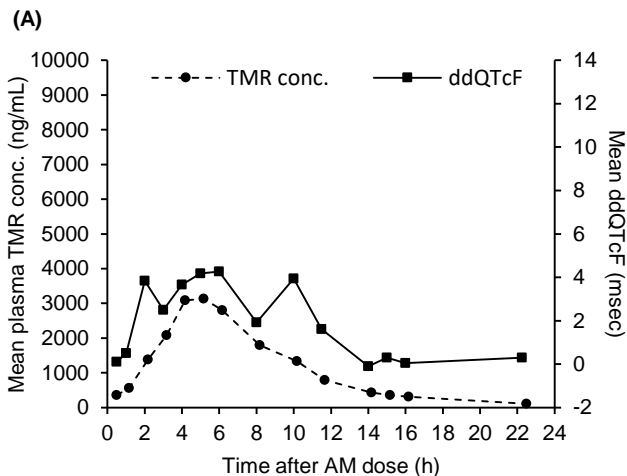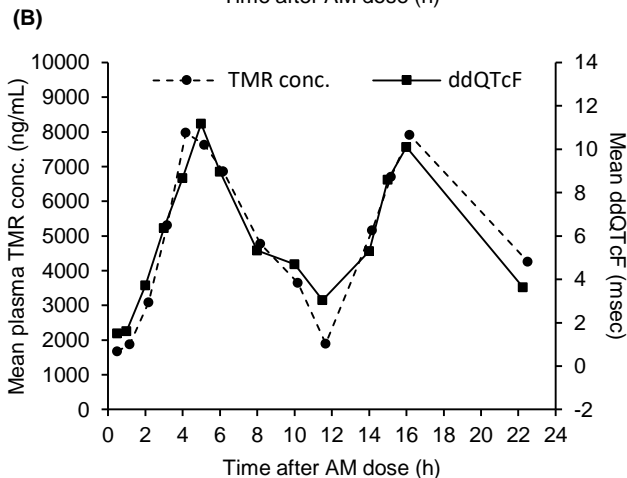

Supplement: CTS-13-769-s002.pdf [file CTS-13-769-s002.pdf]
