# Supplementary material for: Effects of Temsavir, Active Moiety of Antiretroviral Agent Fostemsavir, on QT Interval: Results From a Phase I Study and an Exposure–Response Analysis
Source: PubMed Central journal article supplement — Clin Transl Sci. 2020 Mar 19;13(4):769–76. doi: 10.1111/cts.12763 (PMC7359933; doi:10.1111/cts.12763), 2020-03-19

### Figure S3. Goodness-of-fit plots for the final model

ddQTcF, treatment difference vs placebo for change from baseline in Fridericia-corrected QT interval;  
WRES, weighted residuals; IRES, individual residuals

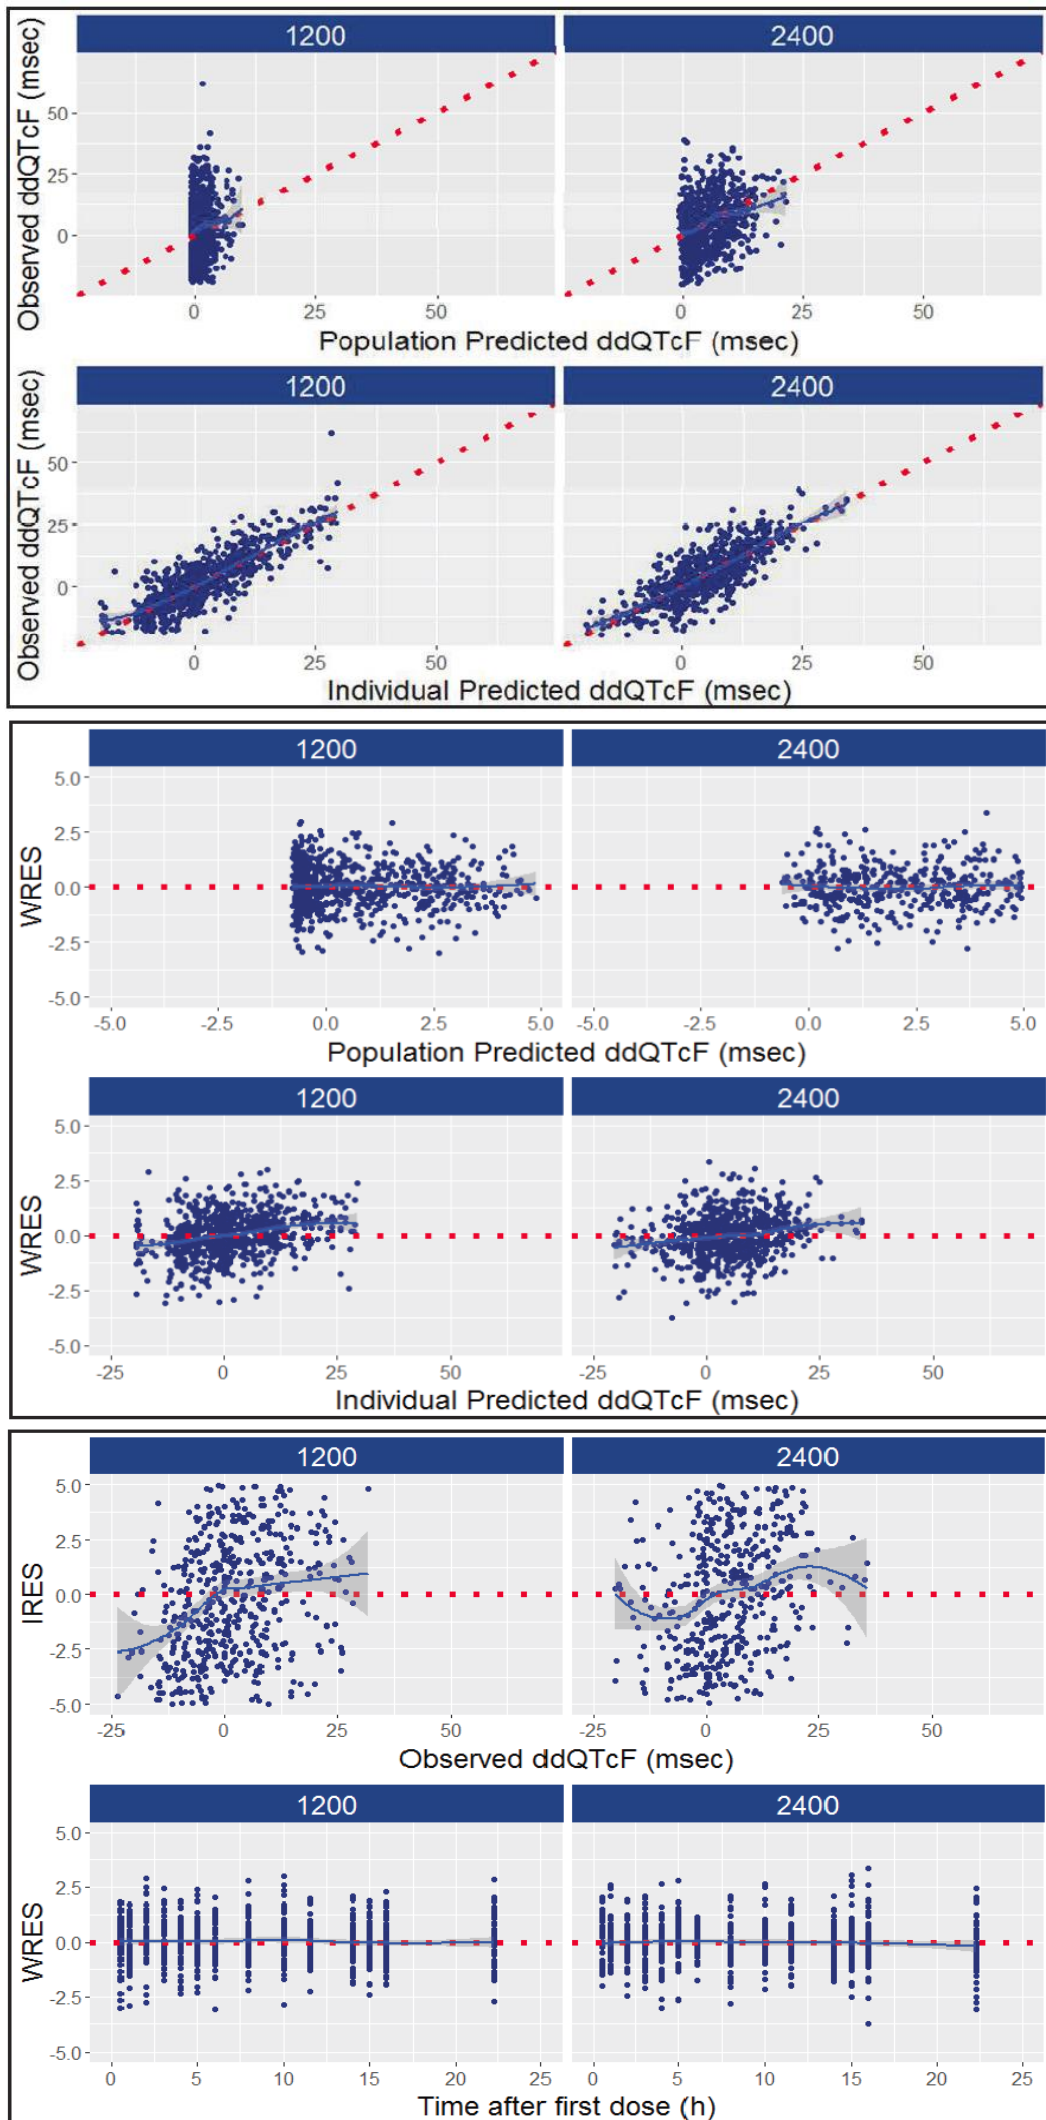

Supplement: CTS-13-769-s003.pdf [file CTS-13-769-s003.pdf]
