# Supplementary material for: Effects of Temsavir, Active Moiety of Antiretroviral Agent Fostemsavir, on QT Interval: Results From a Phase I Study and an Exposure–Response Analysis
Source: PubMed Central journal article supplement — Clin Transl Sci. 2020 Mar 19;13(4):769–76. doi: 10.1111/cts.12763 (PMC7359933; doi:10.1111/cts.12763), 2020-03-19
Supplement: CTS-13-769-s004.pdf [file CTS-13-769-s004.pdf]

**Table S1. Models evaluated***Final model (#5) is shown in bold*

| <b>Linear models</b>          |                                                                                                     |             |                        |                    |                                          |                                     |                       |                       |                           |                       |
|-------------------------------|-----------------------------------------------------------------------------------------------------|-------------|------------------------|--------------------|------------------------------------------|-------------------------------------|-----------------------|-----------------------|---------------------------|-----------------------|
| Model                         | Description                                                                                         | OBJ         | Intercept ( $\alpha$ ) | Slope ( $\beta$ )  | $\omega^2_{intercept}$ ( $\eta_\alpha$ ) | $\omega^2_{slope}$ ( $\eta_\beta$ ) | Occ ( $\eta_\alpha$ ) | $\sigma^2$ (additive) | $\sigma^2$ (proportional) |                       |
| 1                             | Intercept, no slope; IIV additive                                                                   | 8448        | 3.08 (33%)             |                    | 57.5 (25%)                               |                                     |                       | 81.4 (8%)             |                           |                       |
| 2                             | Intercept, no slope; IIV additive fixed                                                             | 9100        | 3.02 (34%)             |                    | 0 [fixed]                                |                                     |                       | 139 (12%)             |                           |                       |
| 3                             | Intercept, slope; IIV additive (intercept only)                                                     | 8216        | -0.333 (375%)          | 0.0011 (14%)       | 60.3 (23%)                               |                                     |                       | 69.5 (8%)             |                           |                       |
| 4                             | Intercept, slope; IIV additive (intercept & slope)                                                  | 8088        | -0.446 (280%)          | 0.0012 (15%)       | 78.3 (21%)                               | 0                                   |                       | 59.2 (7%)             |                           |                       |
| <b>5</b>                      | <b>Intercept, slope; IIV additive (intercept); IOV additive; residual error additive</b>            | <b>7738</b> | <b>-0.783 (139%)</b>   | <b>0.0013 (8%)</b> | <b>36.6 (42%)</b>                        |                                     | <b>47.9 (20%)</b>     | <b>45.5 (6%)</b>      |                           |                       |
| 6                             | Intercept, slope; IIV additive (intercept); IOV additive; residual error proportional               | 7877        | 12.2 (18%)             | 0.0008 (18%)       | 179 (40%)                                |                                     | 46.2 (20%)            |                       | 0.225 (36%)               |                       |
| 7                             | Intercept, slope; IIV additive (intercept); IOV additive; residual error additive + proportional    | 7737        | -0.726 (145%)          | 0.0013 (8%)        | 36.7 (42%)                               |                                     | 47.8 (20%)            | 44.7 (7%)             | 0.0331 (173%)             |                       |
| 8                             | Intercept, slope; IIV additive (intercept & slope); IOV additive intercept; residual error additive | 7730        | -0.754 (145%)          | 0.0013 (8%)        | 36.6 (43%)                               | 0                                   | 47.7 (20%)            | 44.4 (7%)             |                           |                       |
| <b>E<sub>max</sub> models</b> |                                                                                                     |             |                        |                    |                                          |                                     |                       |                       |                           |                       |
| Model                         | Description                                                                                         | OBJ         | E <sub>max</sub>       | EC <sub>50</sub>   | Gamma                                    | E <sub>0</sub>                      | $\omega^2_{EC50}$     | $\omega^2_{E0}$       | $\omega^2_{Emax}$         | $\sigma^2$ (additive) |
| 9                             | E <sub>0</sub> , EC <sub>50</sub> , E <sub>max</sub> , Gamma (fixed)                                | 8185        | 20.3 (13%)             | 3120 (56%)         | 1 [fixed]                                | -3.19 (35%)                         | 8 (34%)               | 1.13 (43%)            | 0.283 (47%)               | 62.1 (7%)             |
| 10                            | E <sub>0</sub> , EC <sub>50</sub> , E <sub>max</sub> , Gamma (fixed)                                | 8392        | 22.1 (11%)             | 2500 (56%)         | 1 [fixed]                                | -5.97 (78%)                         | 7.02 (28%)            |                       |                           | 78.3 (8%)             |

Model fit to the data was evaluated on the following goodness-of-fit criteria: a minimum 3.84 point ( $p < 0.05$ ) decrease in the value of the objective function according to the log-likelihood ratio test; increased precision of estimated parameters; decrease in IIV, and decrease in random residual variability.

Additional criteria were: good agreement between observed and predicted ddQTcF; uniformly scattered weighted residuals versus predicted ddQTcF; visual predictive check and bootstrap analysis.
